# Supplementary material for: Foraminiferal Ecology and Role in Nitrogen Benthic Cycle in the Hypoxic Southeastern Bering Sea
Source: Frontiers journal article supplement (doi:10.3389/fmars.2020.582818), 2020-11-04
Supplement: Table_2.XLSX [file Table_2.XLSX]

## Sheet: Feuil1
							Intracellular NO3				Intracellular NH4
	Species	Station	Water depth	Number	Biovolume	Session	Quantity	Concentration	Denitrification rate		Quantity	Concentration
			(m)	(indiv.)	(106 µm3)		(pmol/indiv)	(mmol/L)	(pmol/ind/day)		(pmol/indiv)	(mmol/L)
	Nonionella pulchella	B	536	11	12.1947	onboard	30.7167	2.51887	0		21.1268	1.73246
	Bolivina spathulata	B	536	19	10.3003	onboard	153.584	14.9106	10.5		62.5978	6.0773
	Globobulimina pacifica	B	536	5	23.4678	onboard	1928.33	82.1692	711.402		105.634	4.50123
	Uvigerina peregrina	B	536	10	18.0819	onboard	95.5631	5.28501	0		56.338	3.11571
	Uvigerina peregrina	B	536	10	4.74407	onboard	92.1502	19.4243	0		42.2535	8.9066
	Bolivinellina pseudopunctata	B	536	11	0.898914	onboard	133.106	148.074	0		28.169	31.3367
	Globobulimina pacifica	G	1535	4	27.145	onboard	17602.4	648.459	45.197		70.4225	2.59431
	Gromiid sp. 1	E2	197	4	5.19055	3 months	281.57	54.2467	15.7599		123.239	23.7431
	Gromiid sp. 2	E2	197	2	17.3153	3 months	452.218	26.1166	107.726		211.268	12.2012
	Nonionella pulchella	E2	197	11	2.33237	3 months	24.8216	10.6422	5.80318		25.6082	10.9795
	Nonionella pulchella	E2	197	15	1.48766	8 months	22.7531	15.2946	0		23.4742	15.7793
	Nonionella pulchella	E2	197	11	4.10556	8 months	27.3038	6.32011	0		28.169	6.52039
	Nonionella pulchella	E2	197	15	13.184	8 months	15.9272	1.20807	0		23.4742	1.78051
	Globobulimina pacifica	E2	197	5	51.9086	8 months	58.0205	1.11774	NA		42.2535	0.813998
	Uvigerina peregrina	E2	197	15	6.81572	8 months	35.1962	5.16398	0		70.4225	10.3324
	Nonionella pulchella	B	536	4	6.77749	8 months	63.9932	9.44202	NA		70.4225	10.3907
